# Supplementary material for: Novel synthesis of dispersed molybdenum and nickel phosphides from thermal carbonization of metal- and phosphorus-containing resins
Source: Royal Society of Chemistry journal article supplement (doi:10.1039/c5dt02464a), 2015-01-01
Supplement: c5dt02464a1.pdf [file c5dt02464a1.pdf]

## Supplementary Information

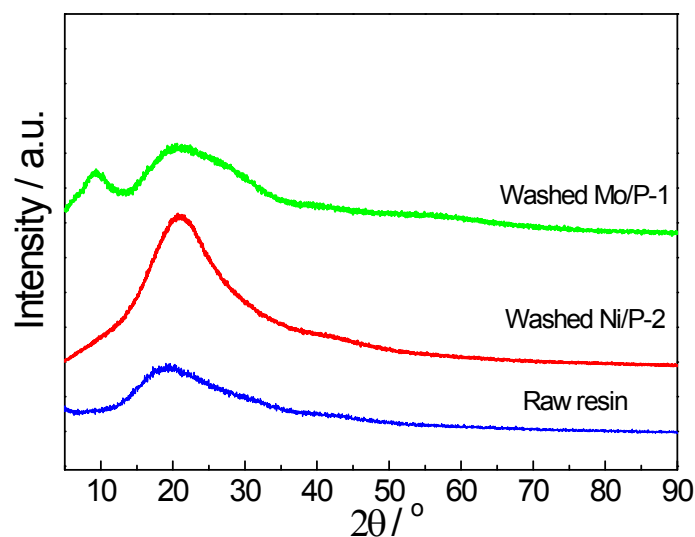

Fig. S1 XRD patterns of the washed (Mo,Ni),P-containing resin precursors as well as raw resin for comparison.

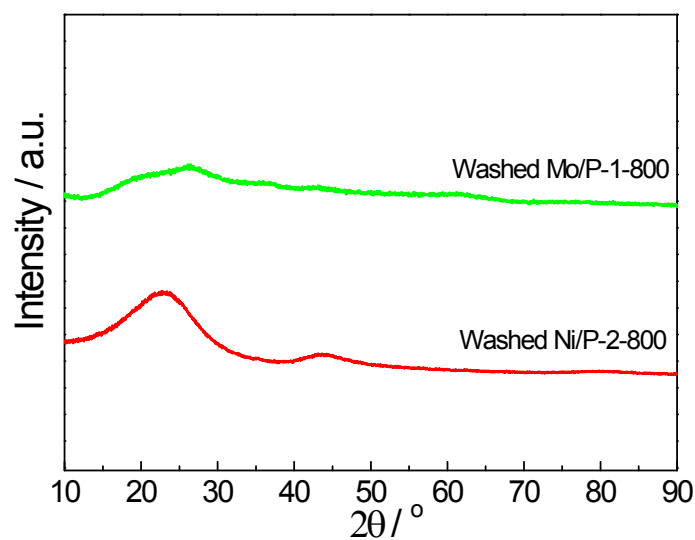

Fig. S2 XRD patterns of the carbonization products of the washed (Mo,Ni),P-containing resin precursors after heating in Ar flow at  $800^\circ\text{C}$ .

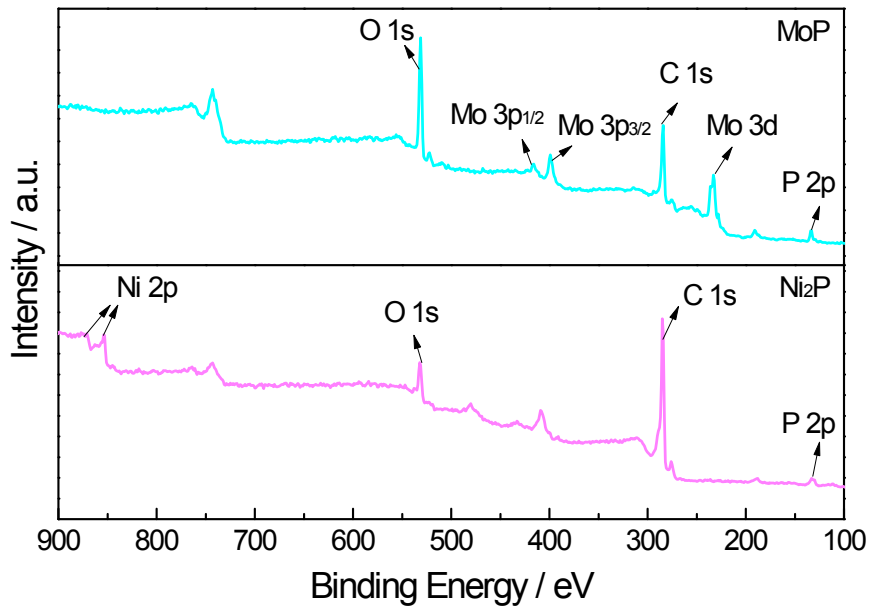

Fig. S3 Full scan width XPS spectra of MoP and Ni<sub>2</sub>P obtained in the study.

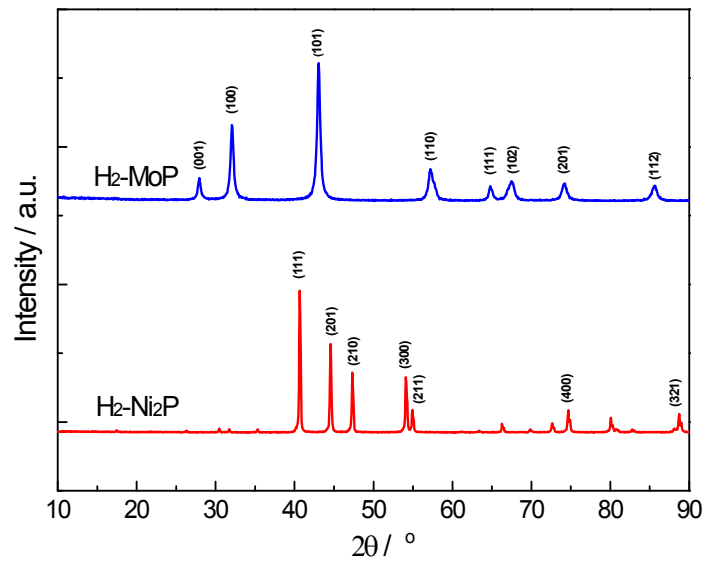

Fig. S4 XRD patterns of H<sub>2</sub>-MoP and H<sub>2</sub>-Ni<sub>2</sub>P samples.

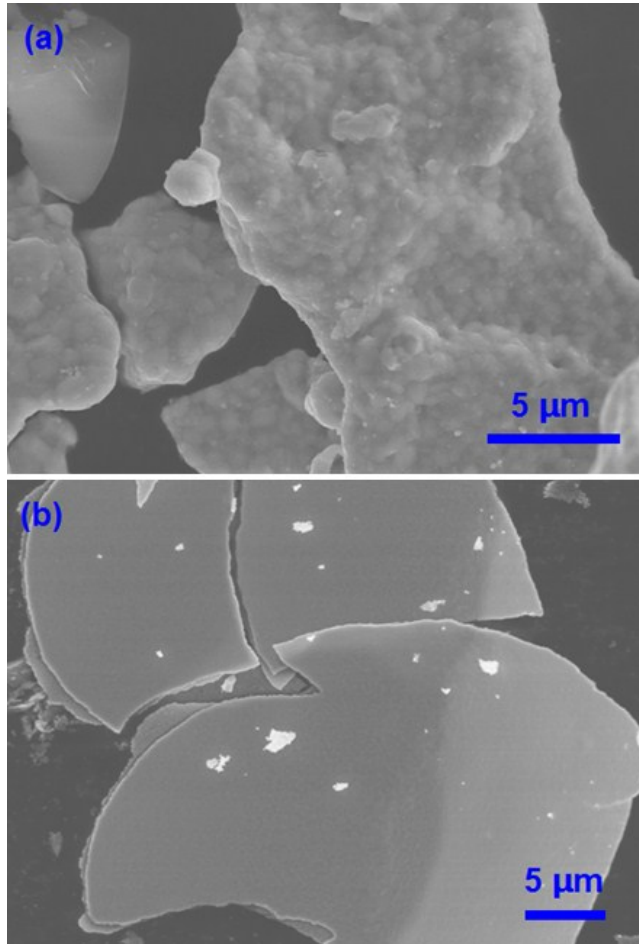

Fig. S5 SEM images of (a) H<sub>2</sub>-Ni<sub>2</sub>P and (b) H<sub>2</sub>-MoP.

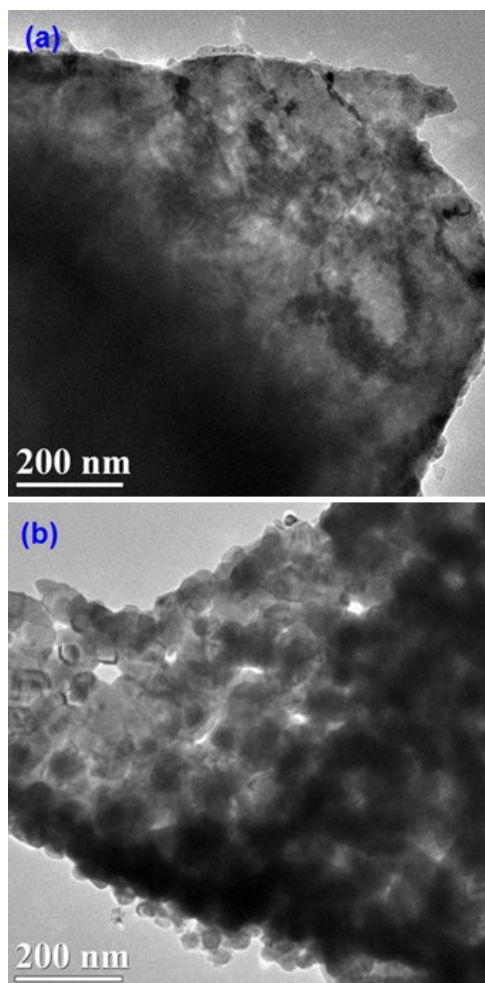

Fig. S6 TEM images of (a)  $H_2$ - $Ni_2P$  and (b)  $H_2$ - $MoP$ .

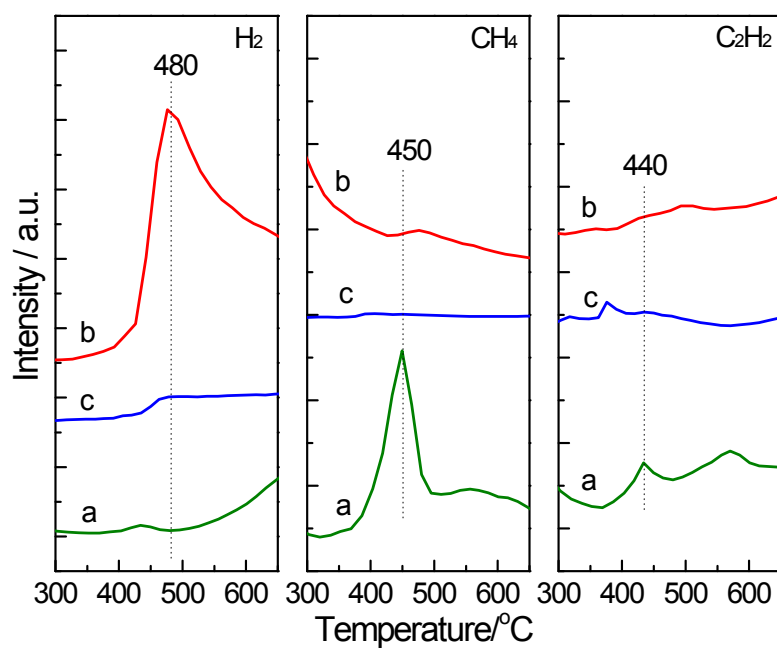

Fig. S7 Low-temperature MS profiles of carbonization of (a) raw resin, (b) Mo,P-containing resin (Mo:P=1:1) and (c) Ni,P-containing resin (Ni:P=1.5:1).
